# Supplementary material
Source: Springer Nature journal article supplement (https://www.springermedizin.de/resource/supplementary/12911_2005_89_MOESM6_ESM.pdf/9527104)

### Before vs. after GRIP

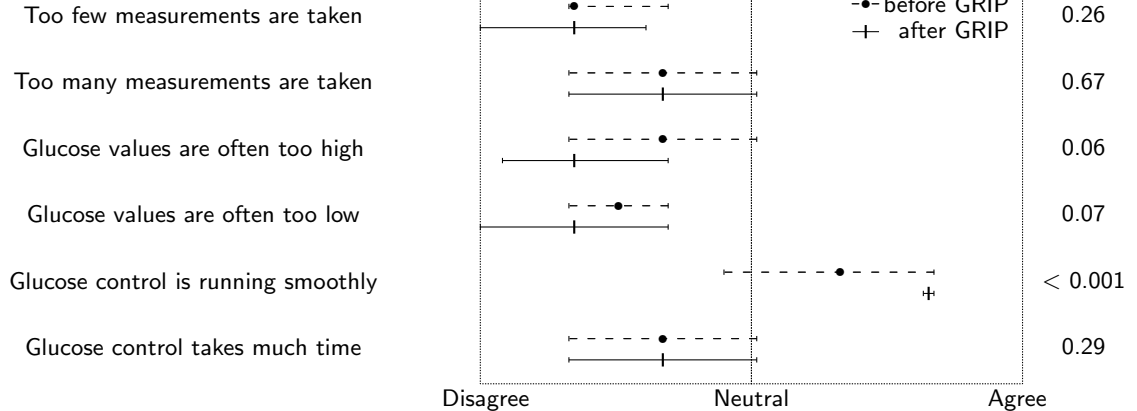

### GRIP specific questions

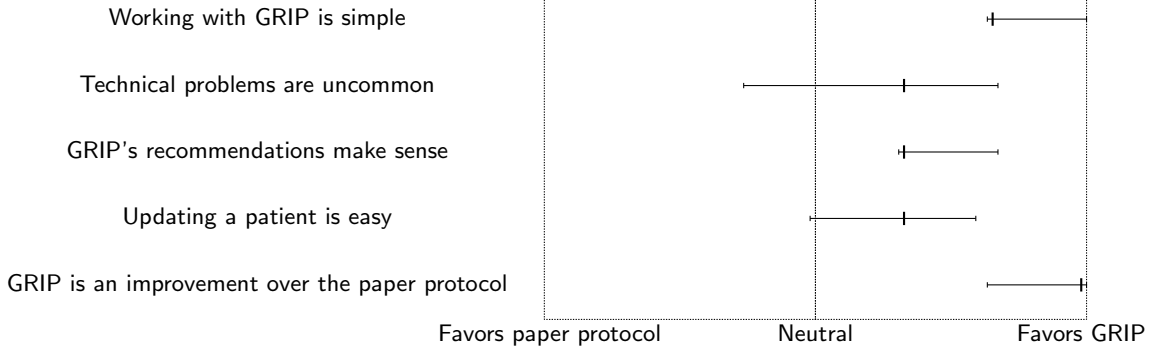

Supplement: MOESM6 [file 9527104]
